# Supplementary material for: Traffic-related air pollution near roadways: discerning local impacts from background
Source: Copernicus journal article supplement (doi:10.5194/amt-12-5247-2019), 2019-10-02
Supplement: Supplementary file 1 [file amt-12-5247-2019-supplement.pdf]

Supplement of Atmos. Meas. Tech., 12, 5247–5261, 2019  
<https://doi.org/10.5194/amt-12-5247-2019-supplement>  
© Author(s) 2019. This work is distributed under  
the Creative Commons Attribution 4.0 License.

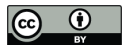

*Supplement of*

## **Traffic-related air pollution near roadways: discerning local impacts from background**

**Nathan Hilker et al.**

*Correspondence to:* Greg J. Evans ([greg.evans@utoronto.ca](mailto:greg.evans@utoronto.ca))

The copyright of individual parts of the supplement might differ from the CC BY 4.0 License.

27 **S1 Data availability**

28 The availability of pollutant data following quality assurance is displayed in Table S1, divided by site and season. The winter  
 29 season is defined as containing the months of December, January, and February in full. Spring is March, April, and May;  
 30 summer is June, July, and August; and lastly fall is September, October, and November.

31

32 **Table S1: Percentage of valid data by site, pollutant, and season.**

| Pollutant         | Site     | 2015   |      | 2016   |        |        |      | 2017   |        |
|-------------------|----------|--------|------|--------|--------|--------|------|--------|--------|
|                   |          | Summer | Fall | Winter | Spring | Summer | Fall | Winter | Spring |
| NO <sub>x</sub>   | NR-TOR-1 | 91     | 99   | 100    | 96     | 96     | 93   | 100    | 99     |
|                   | BG-TOR-1 | 47     | 93   | 95     | 98     | 98     | 100  | 100    | 99     |
|                   | NR-TOR-2 | 100    | 92   | 98     | 63     | 99     | 100  | 1      | 49     |
|                   | BG-TOR-2 | 100    | 61   | 100    | 100    | 88     | 99   | 100    | 99     |
|                   | NR-VAN   | 96     | 82   | 96     | 97     | 98     | 97   | 92     | 96     |
|                   | BG-VAN   | 98     | 98   | 98     | 98     | 98     | 24   | 0      | 0      |
| CO                | NR-TOR-1 | 64     | 94   | 96     | 80     | 79     | 75   | 79     | 80     |
|                   | BG-TOR-1 | 0      | 0    | 0      | 71     | 92     | 94   | 94     | 96     |
|                   | NR-TOR-2 | 91     | 91   | 91     | 91     | 97     | 100  | 96     | 99     |
|                   | BG-TOR-2 | 91     | 88   | 92     | 91     | 82     | 72   | 80     | 91     |
|                   | NR-VAN   | 96     | 48   | 95     | 83     | 92     | 98   | 92     | 96     |
|                   | BG-VAN   | 98     | 98   | 98     | 96     | 98     | 24   | 0      | 0      |
| CO <sub>2</sub>   | NR-TOR-1 | 61     | 99   | 98     | 95     | 96     | 94   | 100    | 99     |
|                   | BG-TOR-1 | 0      | 0    | 0      | 43     | 98     | 100  | 100    | 100    |
|                   | NR-TOR-2 | 100    | 100  | 99     | 100    | 91     | 47   | 97     | 100    |
|                   | BG-TOR-2 | 91     | 86   | 100    | 73     | 85     | 67   | 0      | 27     |
|                   | NR-VAN   | 80     | 84   | 90     | 96     | 100    | 71   | 62     | 97     |
|                   | BG-VAN   | 0      | 0    | 0      | 0      | 0      | 0    | 0      | 0      |
| O <sub>3</sub>    | NR-TOR-1 | 91     | 97   | 100    | 92     | 95     | 91   | 97     | 92     |
|                   | BG-TOR-1 | 47     | 88   | 95     | 98     | 98     | 100  | 99     | 99     |
|                   | NR-TOR-2 | 100    | 94   | 99     | 100    | 100    | 100  | 97     | 99     |
|                   | BG-TOR-2 | 96     | 98   | 79     | 100    | 95     | 99   | 100    | 99     |
|                   | NR-VAN   | 96     | 82   | 96     | 95     | 98     | 97   | 91     | 95     |
|                   | BG-VAN   | 98     | 97   | 97     | 98     | 98     | 24   | 0      | 0      |
| PM <sub>2.5</sub> | NR-TOR-1 | 89     | 97   | 100    | 97     | 96     | 98   | 100    | 89     |
|                   | BG-TOR-1 | 44     | 93   | 95     | 100    | 97     | 100  | 100    | 99     |
|                   | NR-TOR-2 | 97     | 100  | 99     | 99     | 100    | 95   | 95     | 99     |
|                   | BG-TOR-2 | 97     | 97   | 87     | 100    | 95     | 99   | 100    | 99     |
|                   | NR-VAN   | 94     | 83   | 98     | 99     | 81     | 98   | 92     | 97     |

|     |          |     |     |     |     |     |     |     |     |
|-----|----------|-----|-----|-----|-----|-----|-----|-----|-----|
|     | BG-VAN   | 99  | 99  | 100 | 100 | 100 | 24  | 0   | 0   |
| UFP | NR-TOR-1 | 90  | 96  | 99  | 87  | 0   | 78  | 100 | 90  |
|     | BG-TOR-1 | 0   | 0   | 0   | 40  | 97  | 100 | 100 | 99  |
|     | NR-TOR-2 | 80  | 80  | 98  | 99  | 99  | 99  | 96  | 95  |
|     | BG-TOR-2 | 79  | 72  | 96  | 97  | 27  | 4   | 0   | 0   |
|     | NR-VAN   | 97  | 85  | 78  | 96  | 88  | 95  | 91  | 89  |
|     | BG-VAN   | 98  | 66  | 95  | 100 | 97  | 25  | 0   | 0   |
| BC  | NR-TOR-1 | 91  | 99  | 100 | 97  | 89  | 95  | 100 | 99  |
|     | BG-TOR-1 | 0   | 0   | 0   | 58  | 95  | 99  | 100 | 100 |
|     | NR-TOR-2 | 100 | 97  | 97  | 97  | 99  | 94  | 86  | 99  |
|     | BG-TOR-2 | 100 | 98  | 96  | 100 | 87  | 99  | 85  | 99  |
|     | NR-VAN   | 92  | 84  | 98  | 99  | 99  | 100 | 94  | 97  |
|     | BG-VAN   | 98  | 100 | 97  | 96  | 99  | 25  | 0   | 0   |

33

34

35

36

37

38

39

40

41

42

43

44

45

46

47

48

49

50

51

52

53

54

55 **S2 Downwind-upwind measurements**

56

57 **Table S2: Average pollutant concentrations measured at the NR-TOR-1 site, aggregated based on whether an air mass originated**  
 58 **upwind or downwind of the station, along with the downwind-upwind difference.**

| Pollutant                                  | Downwind<br>N | Downwind<br>$\mu \pm 95\%CI$ | Upwind<br>N | Upwind<br>$\mu \pm 95\%CI$ | $\Delta$<br>(Downwind<br>– Upwind) |
|--------------------------------------------|---------------|------------------------------|-------------|----------------------------|------------------------------------|
| NO [ppb]                                   | 2378          | $37.8 \pm 1.1$               | 1787        | $2.9 \pm 0.3$              | 34.9                               |
| NO <sub>2</sub> [ppb]                      | 2303          | $21.2 \pm 0.4$               | 1748        | $10.7 \pm 0.4$             | 10.5                               |
| CO [ppb]                                   | 2015          | $364.4 \pm 5.4$              | 1577        | $226.6 \pm 3.2$            | 137.8                              |
| CO <sub>2</sub> [ppm]                      | 2305          | $437.3 \pm 1.0$              | 1763        | $416.4 \pm 1.1$            | 20.9                               |
| O <sub>3</sub> [ppb]                       | 2313          | $15.3 \pm 0.4$               | 1771        | $33.2 \pm 0.8$             | -17.9                              |
| PM <sub>2.5</sub> [ $\mu\text{g m}^{-3}$ ] | 2377          | $7.68 \pm 0.21$              | 1801        | $9.01 \pm 0.27$            | -1.33                              |
| UFP [ $\text{cm}^{-3}$ ]                   | 1839          | $56975 \pm 1671$             | 1313        | $15305 \pm 513$            | 41670                              |
| BC [ $\mu\text{g m}^{-3}$ ]                | 2338          | $2.13 \pm 0.06$              | 1775        | $0.73 \pm 0.03$            | 1.40                               |

59

60

61

62 **Table S3: Average pollutant concentrations measured at the NR-TOR-2 site, aggregated based on whether an air mass originated**  
 63 **from upwind or downwind of the station, along with the downwind-upwind difference.**

| Pollutant                                  | Downwind<br>N | Downwind<br>$\mu \pm 95\%CI$ | Upwind<br>N | Upwind<br>$\mu \pm 95\%CI$ | $\Delta$ (Downwind –<br>Upwind) |
|--------------------------------------------|---------------|------------------------------|-------------|----------------------------|---------------------------------|
| NO [ppb]                                   | 1970          | $6.0 \pm 0.2$                | 5242        | $3.2 \pm 0.1$              | 2.8                             |
| NO <sub>2</sub> [ppb]                      | 1671          | $8.5 \pm 0.2$                | 4210        | $10.4 \pm 0.2$             | -1.9                            |
| CO [ppb]                                   | 1990          | $247.9 \pm 3.6$              | 5165        | $246.8 \pm 1.9$            | 1.1                             |
| CO <sub>2</sub> [ppm]                      | 1938          | $423.1 \pm 0.7$              | 4994        | $421.4 \pm 0.5$            | 1.7                             |
| O <sub>3</sub> [ppb]                       | 2090          | $24.2 \pm 0.3$               | 5439        | $28.7 \pm 0.3$             | -4.5                            |
| PM <sub>2.5</sub> [ $\mu\text{g m}^{-3}$ ] | 2036          | $3.80 \pm 0.12$              | 5435        | $9.01 \pm 0.15$            | -5.21                           |
| UFP [ $\text{cm}^{-3}$ ]                   | 1974          | $12878 \pm 398$              | 5087        | $16676 \pm 220$            | -3798                           |
| BC [ $\mu\text{g m}^{-3}$ ]                | 2059          | $0.63 \pm 0.02$              | 5299        | $0.81 \pm 0.02$            | -0.18                           |

64

65

66

67

68

69 **Table S4: Average pollutant concentrations measured at the NR-VAN site, aggregated based on whether an air mass originated**  
 70 **from upwind or downwind of the station, along with the downwind-upwind difference.**

| Pollutant                                  | Downwind<br>N | Downwind<br>$\mu \pm 95\%CI$ | Upwind<br>N | Upwind<br>$\mu \pm 95\%CI$ | $\Delta$ (Downwind<br>– Upwind) |
|--------------------------------------------|---------------|------------------------------|-------------|----------------------------|---------------------------------|
| NO [ppb]                                   | 2472          | $56.6 \pm 2.5$               | 1887        | $9.7 \pm 0.7$              | 46.8                            |
| NO <sub>2</sub> [ppb]                      | 2475          | $21.9 \pm 0.4$               | 1890        | $11.5 \pm 0.3$             | 10.4                            |
| CO [ppb]                                   | 2222          | $414.3 \pm 12.8$             | 1615        | $210.1 \pm 4.5$            | 204.2                           |
| CO <sub>2</sub> [ppm]                      | 2338          | $461.6 \pm 3.3$              | 1829        | $414.5 \pm 1.2$            | 47.1                            |
| O <sub>3</sub> [ppb]                       | 2454          | $9.4 \pm 0.4$                | 1861        | $19.7 \pm 0.5$             | -10.3                           |
| PM <sub>2.5</sub> [ $\mu\text{g m}^{-3}$ ] | 2460          | $8.81 \pm 0.26$              | 1742        | $5.57 \pm 0.19$            | 3.23                            |
| UFP [ $\text{cm}^{-3}$ ]                   | 2314          | $29960 \pm 776$              | 1784        | $14060 \pm 381$            | 15900                           |
| BC [ $\mu\text{g m}^{-3}$ ]                | 2547          | $2.48 \pm 0.07$              | 1909        | $0.84 \pm 0.04$            | 1.64                            |

71

72

73

74 **S2.1 Site meteorology and downwind/upwind diurnal patterns**

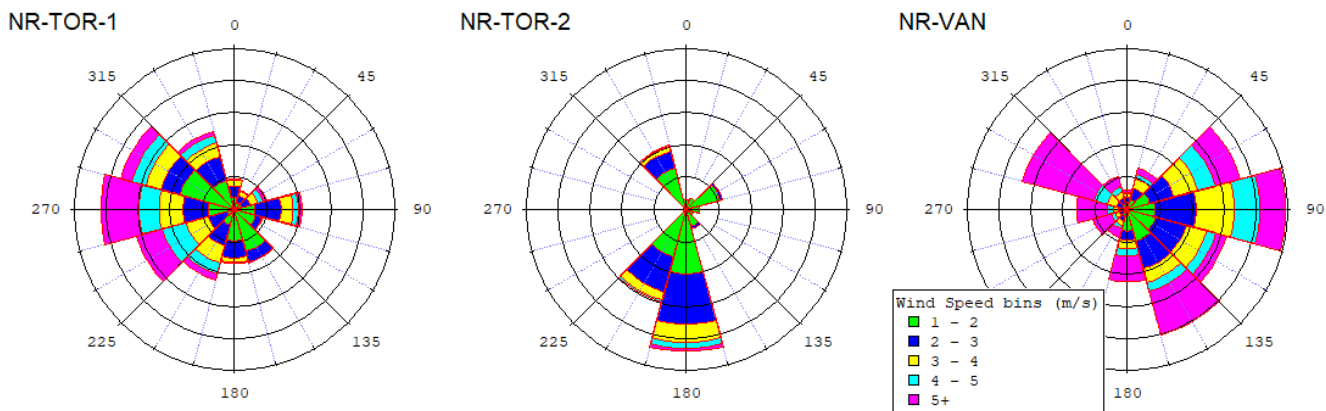

75

76 **Figure S1: Frequency of wind measurements made at each near-road site: NR-TOR-1 (left), NR-TOR-2 (middle), and NR-VAN**  
 77 **(right) throughout the two year measurement campaign.**

78

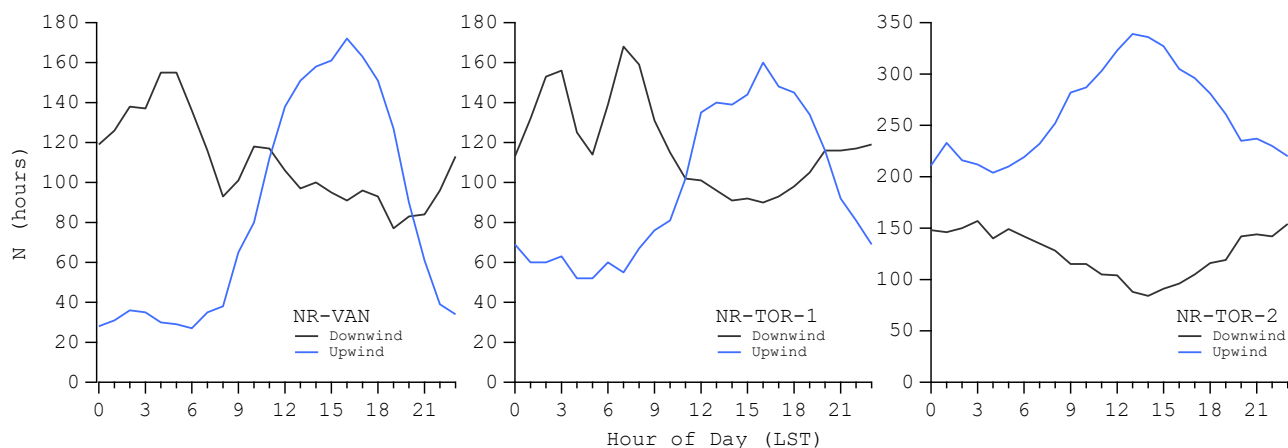

79

80 **Figure S2: Frequency of hourly measurements originating from downwind and upwind of the major roadways upon which NR-**  
 81 **VAN (left), NR-TOR-1(middle), and NR-TOR-2(right) are stationed.**

82

83 As can be seen in Figure S2, each near-road site exhibited non-uniform diurnal patterns in frequency of downwind and upwind  
 84 samples, meaning  $C_{L,2}$  may be biased by these diurnal effects. Tables S5 and S6 show the differences between using all  
 85 collected data for  $C_{L,2}$ , and what the average local concentration would be if downwind/upwind sampling was uniform (i.e.  
 86  $C_{L,2,uniform}$ ). These uniform values were calculated by randomly sampling ‘N’ values per hour of day, where N is based on the  
 87 diurnal minima in Figure S2. This process was repeated 100 times for each pollutant at NR-TOR-1 (Table S5) and NR-VAN  
 88 (Table S6), and the average downwind and upwind values from this are reported as  $DW_{uniform}$  and  $UW_{uniform}$ , respectively.

89

90 **Table S5: Downwind and upwind pollutant averages at NR-TOR-1.  $DW_{uniform}$  and  $UW_{uniform}$  denote downwind and upwind pollutant**  
 91 **averages using an equivalent number of samples from each hour of day so as to not be biased by diurnal effects.**

| Pollutant                                  | DW    | $DW_{uniform}$ | UW    | $UW_{uniform}$ | $C_{L,2}$ | $C_{L,2,uniform}$ | % diff |
|--------------------------------------------|-------|----------------|-------|----------------|-----------|-------------------|--------|
| NO [ppb]                                   | 37.8  | 37.3           | 2.9   | 2.9            | 34.9      | 34.4              | 1      |
| NO <sub>2</sub> [ppb]                      | 21.2  | 20.9           | 10.7  | 12.1           | 10.5      | 8.8               | 16     |
| CO [ppb]                                   | 364.4 | 361.1          | 222.6 | 230.4          | 141.8     | 130.7             | 8      |
| CO <sub>2</sub> [ppm]                      | 437.3 | 436.8          | 416.4 | 420.8          | 20.9      | 16                | 23     |
| O <sub>3</sub> [ppb]                       | 15.3  | 15.5           | 33.2  | 28.3           | -17.9     | -12.8             | 28     |
| PM <sub>2.5</sub> [ $\mu\text{g m}^{-3}$ ] | 7.68  | 7.6            | 9.01  | 9.37           | -1.33     | -1.77             | -33    |
| UFP [ $\text{cm}^{-3}$ ]                   | 57000 | 56400          | 15300 | 14600          | 41700     | 41800             | 0      |
| BC [ $\mu\text{g m}^{-3}$ ]                | 2.13  | 2.11           | 0.73  | 0.71           | 1.4       | 1.4               | 0      |

92

93

94 **Table S6: Downwind and upwind pollutant averages at NR-VAN.  $DW_{uniform}$  and  $UW_{uniform}$  denote downwind and upwind pollutant**  
 95 **averages using an equivalent number of samples from each hour of day so as to not be biased by diurnal effects.**

| Pollutant                                  | DW    | $DW_{uniform}$ | UW    | $UW_{uniform}$ | $C_{L,2}$ | $C_{L,2,uniform}$ | % diff |
|--------------------------------------------|-------|----------------|-------|----------------|-----------|-------------------|--------|
| NO [ppb]                                   | 56.6  | 56             | 9.7   | 11.5           | 46.9      | 44.5              | 5      |
| NO <sub>2</sub> [ppb]                      | 21.9  | 22.2           | 11.5  | 11.9           | 10.4      | 10.3              | 1      |
| CO [ppb]                                   | 414.3 | 416.7          | 210.1 | 216.1          | 204.2     | 200.6             | 2      |
| CO <sub>2</sub> [ppm]                      | 461.6 | 459.6          | 414.5 | 417            | 47.1      | 42.6              | 10     |
| O <sub>3</sub> [ppb]                       | 9.4   | 9.9            | 19.7  | 17.1           | -10.3     | -7.2              | 30     |
| PM <sub>2.5</sub> [ $\mu\text{g m}^{-3}$ ] | 8.81  | 8.87           | 5.57  | 5.42           | 3.24      | 3.45              | -6     |
| UFP [ $\text{cm}^{-3}$ ]                   | 30000 | 30800          | 14000 | 13500          | 16000     | 17300             | -8     |
| BC [ $\mu\text{g m}^{-3}$ ]                | 2.48  | 2.11           | 0.84  | 0.71           | 1.64      | 1.4               | 15     |

96

97

98

99

100

101

102

103

104

105

106

107

108

109

110

111

112

113

114

115

116 **S3 Implications for using downwind-upwind analysis for estimating local TRAP concentrations**

117 For the stations positioned on flat terrain (NR-VAN and NR-TOR-1), the average difference between downwind and upwind  
118 pollutant concentrations, Method 2, has yielded larger local concentrations for all pollutants (with the exception of PM<sub>2.5</sub>)  
119 when compared with methods 1 and 3. Recall that Method 1 generates local concentrations,  $C_{L,1}$  via:

120 
$$\bar{C}_{L,1} = \bar{C}_{NR} - \bar{C}_{BG} , \tag{1}$$

121 where  $C_{NR}$  and  $C_{BG}$  are concentrations explicitly measured at near-road and background locations, respectively. Whereas  
122 Method 2 determines local concentrations,  $C_{L,2}$ , from:

123 
$$\bar{C}_{L,2} = \bar{C}_{DW} - \bar{C}_{UW} , \tag{2}$$

124 where  $C_{DW}$  and  $C_{UW}$  are pollutant concentrations measured when air masses are originating downwind and upwind from the  
125 roadway at a near-road receptor, respectively. Presumably, average concentrations measured at near-road locations during  
126 upwind conditions are similar to those at nearby background locations, as neither receptor is impacted significantly by local  
127 sources during these times. Given this, the average difference between local concentrations generated using methods 1 and 2  
128 is approximated with the following equality:

129 
$$\bar{C}_{UW} \approx \bar{C}_{BG} \Rightarrow \bar{C}_{L,2} - \bar{C}_{L,1} \approx \bar{C}_{DW} - \bar{C}_{NR} , \tag{3}$$

130 The above equalities state, in other words, that if average upwind concentrations at a near-road location are roughly equivalent  
131 to average background concentrations, then the difference between local TRAP concentrations inferred through methods 2 and  
132 1 should be similar to the difference between average downwind and total near-road concentrations.

133 Firstly, to test the assumption  $C_{UW} \approx C_{BG}$ , these concentrations were calculated at NR-VAN, BG-VAN, NR-TOR-1, and BG-  
134 TOR-1 and are reported in Table S7.

135  
136  
137  
138  
139  
140  
141  
142  
143  
144  
145



146 **Table S7: Average upwind concentrations at NR-VAN and NR-TOR-1, compared with average pollutant concentrations measured**  
 147 **at BG-VAN and BG-TOR-1.**

| Pollutant                                  | $C_{UW}$<br>NR-VAN | $C_{BG}$<br>BG-VAN | $C_{UW}$<br>NR-TOR-1 | $C_{BG}$<br>BG-TOR-1 |
|--------------------------------------------|--------------------|--------------------|----------------------|----------------------|
| NO [ppb]                                   | 9.7                | 9.2                | 2.9                  | 3.5                  |
| NO <sub>2</sub> [ppb]                      | 11.5               | 14.2               | 10.7                 | 10.8                 |
| CO [ppb]                                   | 210.1              | 228.9              | 226.6                | 210.6                |
| CO <sub>2</sub> [ppm]                      | 414.5              |                    | 416.4                | 420.3                |
| O <sub>3</sub> [ppb]                       | 19.7               | 15.9               | 33.2                 | 24.7                 |
| PM <sub>2.5</sub> [ $\mu\text{g m}^{-3}$ ] | 5.57               | 5.41               | 9.01                 | 7.86                 |
| UFP [ $\text{cm}^{-3}$ ]                   | 14060              | 12880              | 15305                | 11968                |
| BC [ $\mu\text{g m}^{-3}$ ]                | 0.84               | 0.66               | 0.73                 | 0.58                 |

148

149 The differences in background pollutant quantities measured through these two methods agree fairly well with one another,  
 150 with maximum differences of ~20%. Hence, the assumption that these two average quantities are approximately equivalent  
 151 appears to be valid. The differences in Table S7 are not large enough to explain the differences observed between methods 1  
 152 and 2 in Tables 2-4. Table S8 shows the differences between  $C_{DW}$  and  $C_{NR}$  at NR-VAN and NR-TOR-1, as well as differences  
 153 between methods 2 and 1 at these sites, and the similarities are evident. Therefore, the aforementioned equality in Eq. (3)  
 154 appears valid. Furthermore, Method 2 appears to over-predict average local concentrations by factors of ~1.7 and ~1.4  
 155 (neglecting PM<sub>2.5</sub>) at NR-VAN and NR-TOR-1, respectively.

156

157 **Table S8: Average near-roar road and downwind concentrations at NR-VAN and NR-TOR-1, along with differences between these**  
 158 **two average quantities, and differences between average local quantities inferred through methods 2 and 1.**

| Pollutant                                  | NR-VAN   |          |                   |                     |                   | NR-TOR-1 |          |                   |                     |                   |
|--------------------------------------------|----------|----------|-------------------|---------------------|-------------------|----------|----------|-------------------|---------------------|-------------------|
|                                            | $C_{NR}$ | $C_{DW}$ | $C_{DW} - C_{NR}$ | $C_{L,2} - C_{L,1}$ | $C_{L,2}/C_{L,1}$ | $C_{NR}$ | $C_{DW}$ | $C_{DW} - C_{NR}$ | $C_{L,2} - C_{L,1}$ | $C_{L,2}/C_{L,1}$ |
| NO [ppb]                                   | 36.9     | 56.6     | 19.7              | 23.8                | 2.0               | 24.6     | 37.8     | 13.2              | 13.4                | 1.6               |
| NO <sub>2</sub> [ppb]                      | 21.5     | 21.9     | 0.4               | 5.3                 | 2.0               | 19.3     | 21.2     | 1.9               | 1.8                 | 1.2               |
| CO [ppb]                                   | 349.7    | 414.3    | 64.6              | 108.5               | 2.1               | 328.4    | 364.4    | 36.0              | 34.7                | 1.3               |
| CO <sub>2</sub> [ppm]                      | 439.8    | 461.6    | 21.8              | -                   | -                 | 436.8    | 437.3    | 0.5               | 6.5                 | 1.5               |
| PM <sub>2.5</sub> [ $\mu\text{g m}^{-3}$ ] | 7.79     | 8.81     | 1.02              | 0.97                | 1.4               | 9.39     | 7.68     | -1.71             | -2.82               | -0.9              |
| UFP [ $\text{cm}^{-3}$ ]                   | 27570    | 29956    | 2386              | 4334                | 1.4               | 39987    | 56975    | 16988             | 12065               | 1.4               |
| BC [ $\mu\text{g m}^{-3}$ ]                | 1.88     | 2.48     | 0.60              | 0.46                | 1.4               | 1.68     | 2.13     | 0.45              | 0.37                | 1.4               |

159

160 **S4. Sensitivity of method 3 to window duration**

161 The choice of input parameters  $\alpha$  and  $W$  play a large role on the magnitude of average local concentrations determined using  
 162 method 3. Here a sensitivity analysis shows the range of average local concentrations observed for each pollutant and near-  
 163 road site when  $W$  is varied between 6 [hr] and 14 [hr]. The smoothing parameter,  $\alpha$ , is constrained at  $\alpha = 4$  for the purposes of  
 164 comparison.

165

166 **Table S9: Average  $CL_{3}$  values by site and pollutant for  $W = 6$  and  $W = 14$  [hr]. The smoothing parameter,  $\alpha$ , is set to 4.**

| Pollutant                                  | NR-VAN |        | NR-TOR-1 |        | NR-TOR-2 |        |
|--------------------------------------------|--------|--------|----------|--------|----------|--------|
|                                            | W = 6  | W = 14 | W = 6    | W = 14 | W = 6    | W = 14 |
| NO [ppb]                                   | 24.0   | 30.9   | 15.4     | 20.8   | 3.4      | 4.2    |
| NO <sub>2</sub> [ppb]                      | 8.0    | 11.4   | 7.4      | 11.1   | 4.5      | 6.3    |
| CO [ppb]                                   | 132.3  | 172.7  | 95.7     | 132.9  | 57.4     | 81.0   |
| CO <sub>2</sub> [ppm]                      | 31.4   | 47.7   | 16.6     | 22.7   | 11.1     | 15.6   |
| O <sub>3</sub> [ppb]                       | -8.4   | -13.3  | -9.7     | -15.7  | -7.1     | -11.4  |
| PM <sub>2.5</sub> [ $\mu\text{g m}^{-3}$ ] | 3.34   | 4.59   | 3.52     | 5.18   | 2.33     | 3.63   |
| UFP [ $\text{cm}^{-3}$ ]                   | 13057  | 17265  | 18843    | 26520  | 6031     | 8251   |
| BC [ $\mu\text{g m}^{-3}$ ]                | 1.09   | 1.41   | 0.84     | 1.15   | 0.35     | 0.48   |

167

168

169

170

171

172

173

174

175

176

177

178

179

180 **S5 Regression of near-road data with respect to wind speed**

181 **Table S10: Regression parameters for the wind-speed dependence of each TRAP measured at the near-road sites.**

| Pollutant       | NR-VAN |      | NR-TOR-1 |      |
|-----------------|--------|------|----------|------|
|                 | c1     | c2   | c1       | c2   |
| NO              | 2.56   | 0.83 | 1.56     | 0.51 |
| NO <sub>2</sub> | 1.62   | 0.40 | 1.50     | 0.46 |
| CO              | 2.53   | 0.81 | 1.54     | 0.50 |
| CO <sub>2</sub> | 2.36   | 0.76 | 2.05     | 0.88 |
| UFP             | 1.58   | 0.37 | 1.01     | 0.01 |
| BC              | 1.76   | 0.47 | 1.62     | 0.56 |
| Average Values  | 2.02   | 0.59 | 1.55     | 0.49 |

182

183

184

185 **S5.1 Regression differentiated by weekday and weekend**

186 The mechanics of dispersion should be unaffected by day of week, and thus local pollutant concentrations should exhibit  
 187 similar wind speed relationships between weekdays and weekends. One reason why dispersion in the near-road environment  
 188 would inherently differ between weekdays and weekends is the greater traffic densities seen on weekdays may result in greater  
 189 vehicular-induced turbulence. Figure S1 shows the relationship between normalized local concentrations and wind speed at  
 190 NR-VAN and NR-TOR-1; it is important to note here that the concentrations are normalized with respect to a mean calculated  
 191 for all days. Thus, this relationship will differ in the sense that lower local concentrations were seen on weekends.

192

193

194

195

196

197

198

199

200

201

202

203 **Table S11: Regression parameters for the wind-speed dependence of each TRAP measured at the near-road sites separated by**  
 204 **weekdays and weekends.**

| Pollutant      | NR-VAN   |          |          |          | NR-TOR-1 |          |          |          |
|----------------|----------|----------|----------|----------|----------|----------|----------|----------|
|                | c1       |          | c2       |          | c1       |          | c2       |          |
|                | Weekdays | Weekends | Weekdays | Weekends | Weekdays | Weekends | Weekdays | Weekends |
| NO             | 2.74     | 2.08     | 0.74     | 1.17     | 1.81     | 0.78     | 0.46     | 0.68     |
| NO2            | 1.69     | 1.40     | 0.33     | 0.57     | 1.56     | 1.33     | 0.37     | 0.80     |
| CO             | 2.68     | 2.12     | 0.79     | 0.85     | 1.60     | 1.36     | 0.51     | 0.46     |
| CO2            | 2.35     | 2.36     | 0.68     | 0.98     | 2.15     | 1.73     | 0.84     | 1.00     |
| UFP            | 1.77     | 1.04     | 0.35     | 0.41     | 1.11     | 0.72     | -0.03    | 0.15     |
| BC             | 1.95     | 1.20     | 0.41     | 0.72     | 1.86     | 0.86     | 0.49     | 0.77     |
| Average Values | 2.20     | 1.70     | 0.55     | 0.79     | 1.68     | 1.01     | 0.44     | 0.64     |

205

206

207

208

209

210

211

212

213

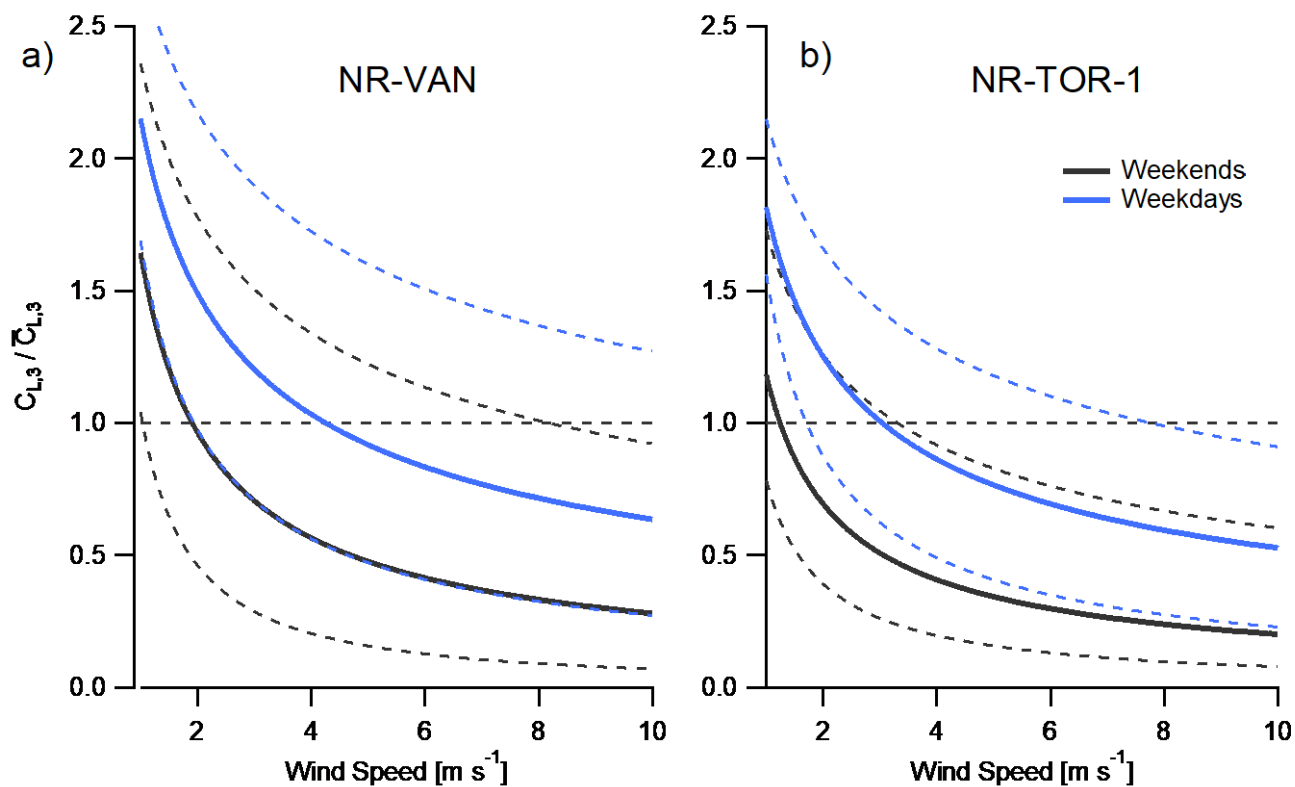

214

215 **Figure S3: Normalized local pollutant concentrations determined using method 3 with respect to wind speed at NR-VAN (a) and**  
 216 **NR-TOR-1 (b). Solid blue lines indicate the average trend amongst all TRAPs on weekdays and solid black lines on weekends.**  
 217 **Dashed lines indicate the range of variability between pollutants.**

218

219

220

221

222

223 **S6 Fraction of pollution attributable to local and background sources**

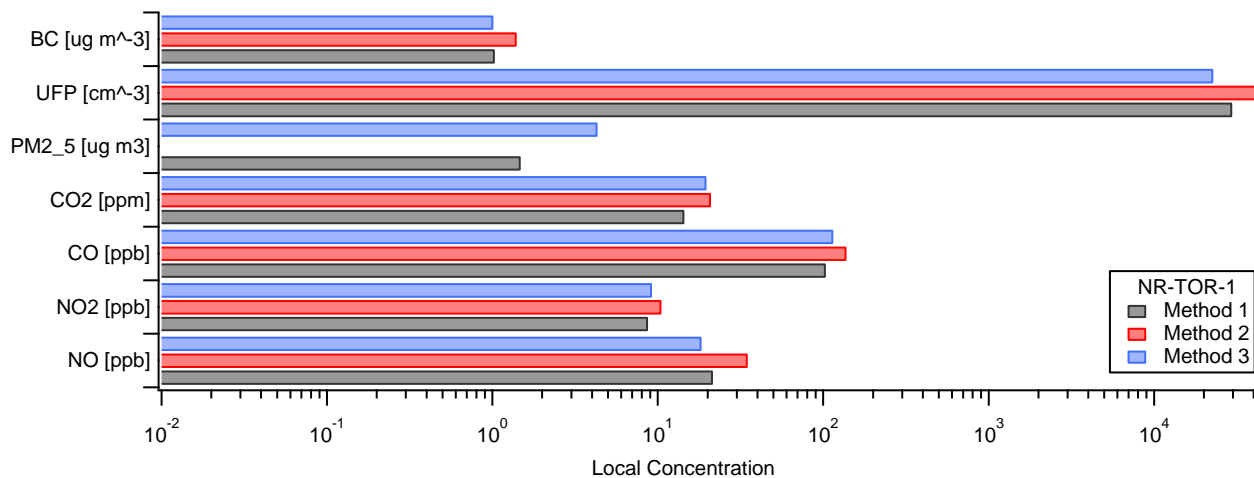

224  
 225 **Figure S4: Local pollutant concentrations determined using each method at NR-TOR-1.**

226  
 227  
 228  
 229  
 230  
 231  
 232  
 233  
 234  
 235  
 236  
 237  
 238  
 239  
 240  
 241  
 242  
 243  
 244  
 245

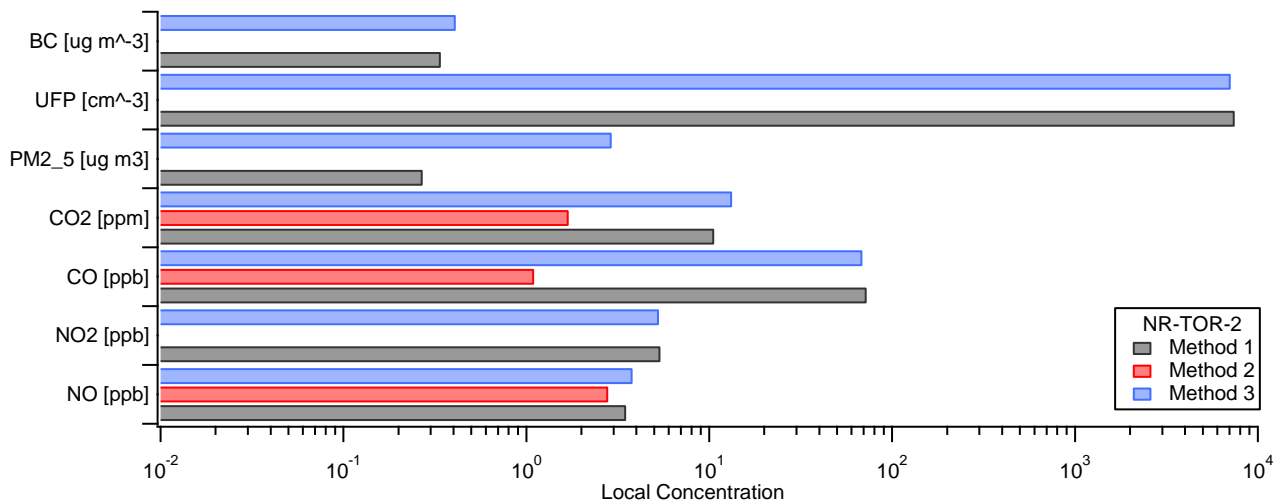

246

247 **Figure S5: Local pollutant concentrations determined using each method at NR-TOR-2.**

248

249

250

251

252

253

254

255

256

257

258

259

260

261

262

263

264

265

266

267

268

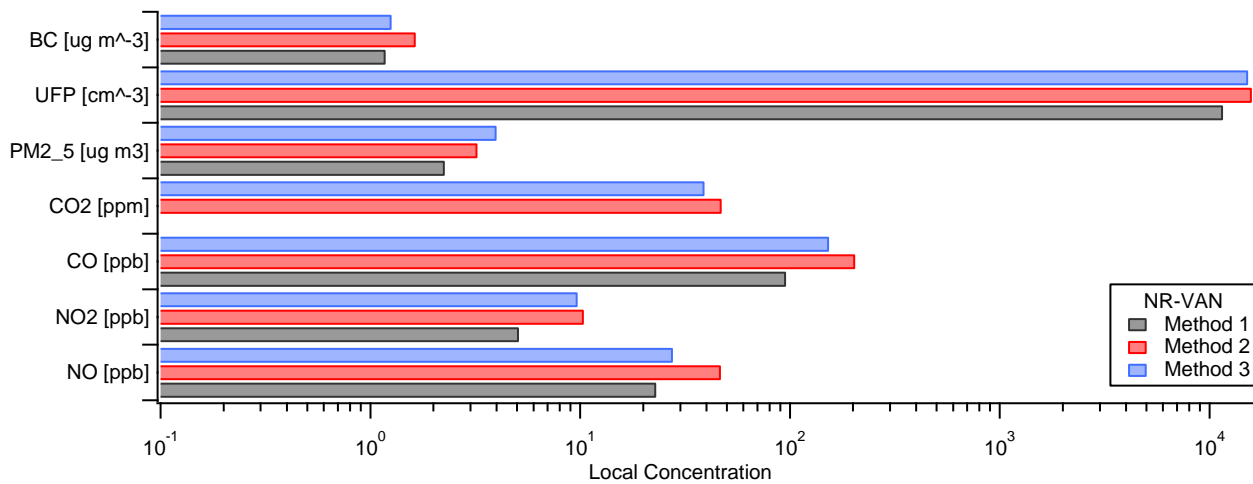

269  
 270 **Figure S6: Local pollutant concentrations determined using each method at NR-VAN.**

271  
 272  
 273  
 274  
 275  
 276  
 277  
 278  
 279  
 280  
 281  
 282  
 283  
 284  
 285  
 286



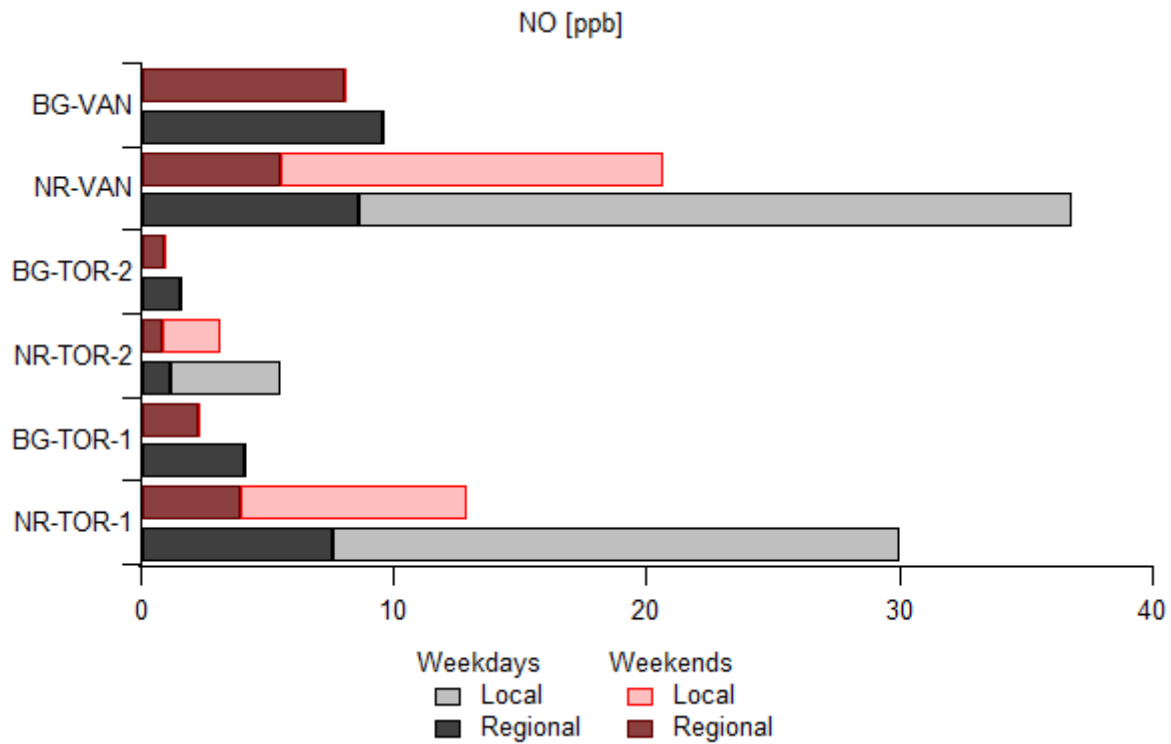

287

288 **Figure S7: Nitric oxide concentrations measured at each monitoring location in this study. Each site is separated by weekday and**  
 289 **weekend, and bars at near-road sites are stacked according to concentrations attributed to local and regional sources. Background**  
 290 **stations are presumed fully regional and therefore contain no local component.**

291

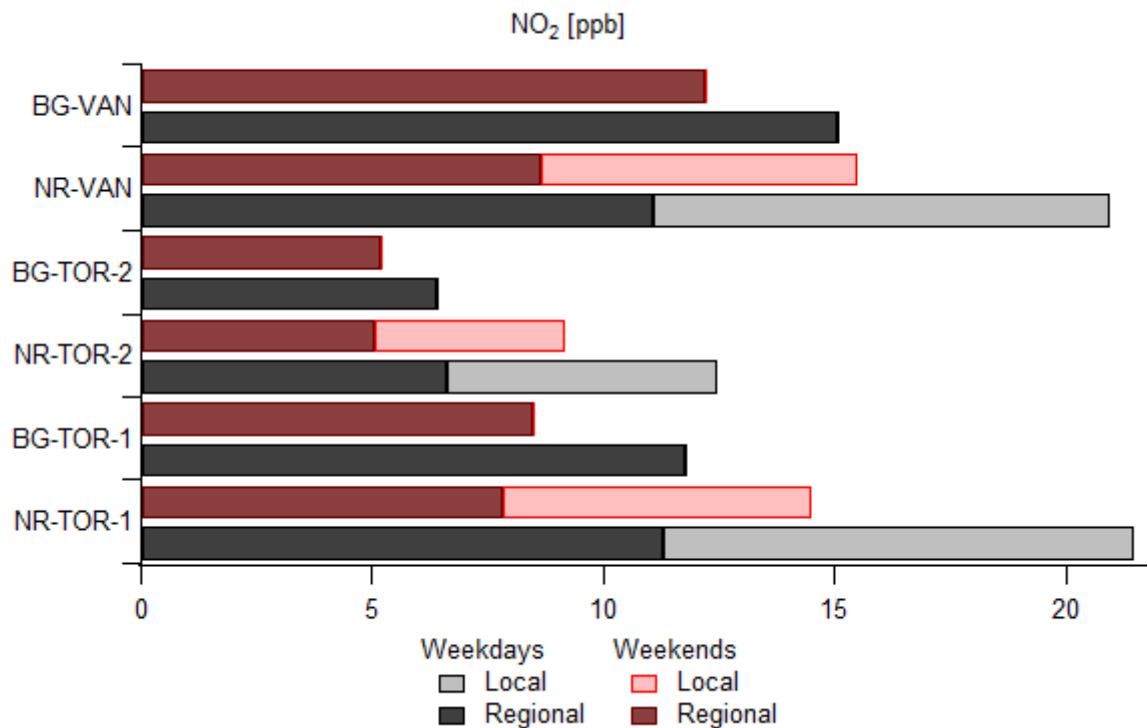

292

293 **Figure S8: Nitrogen dioxide concentrations measured at each monitoring location in this study. Each site is separated by weekday**  
 294 **and weekend, and bars at near-road sites are stacked according to concentrations attributed to local and regional sources.**  
 295 **Background stations are presumed fully regional and therefore contain no local component.**

296

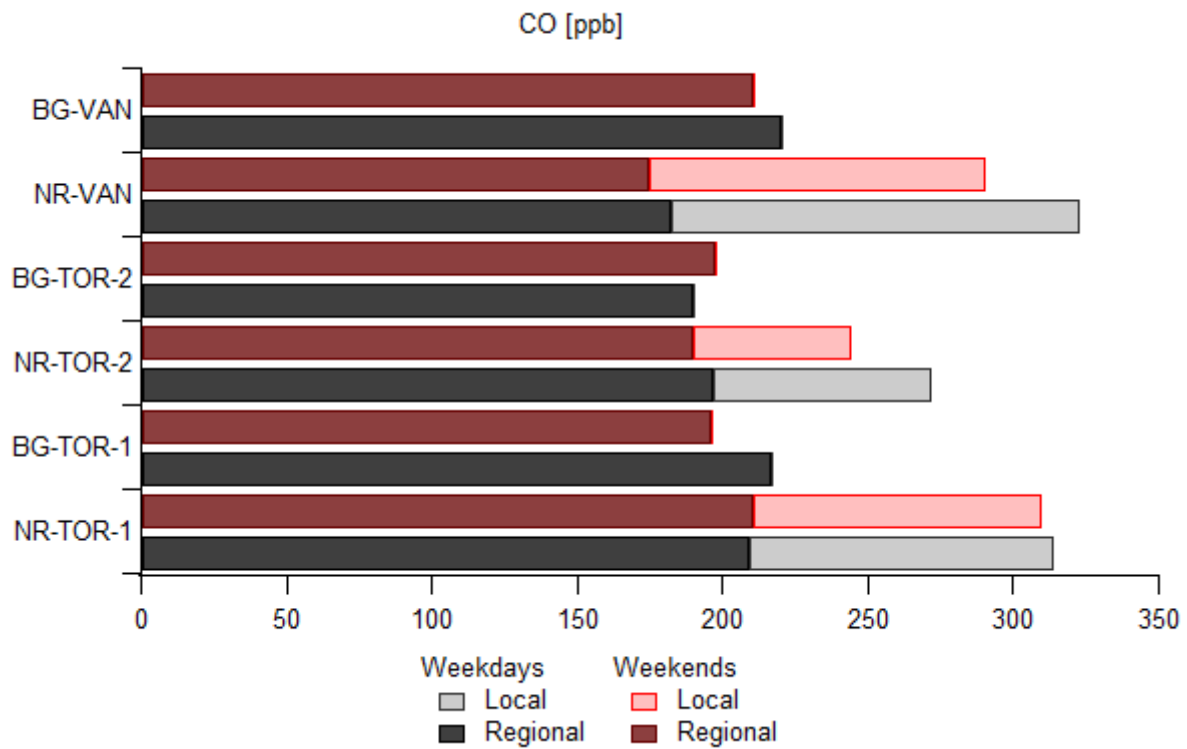

297

298 **Figure S9: Carbon monoxide concentrations measured at each monitoring location in this study. Each site is separated by weekday**  
 299 **and weekend, and bars at near-road sites are stacked according to concentrations attributed to local and regional sources.**  
 300 **Background stations are presumed fully regional and therefore contain no local component.**

301

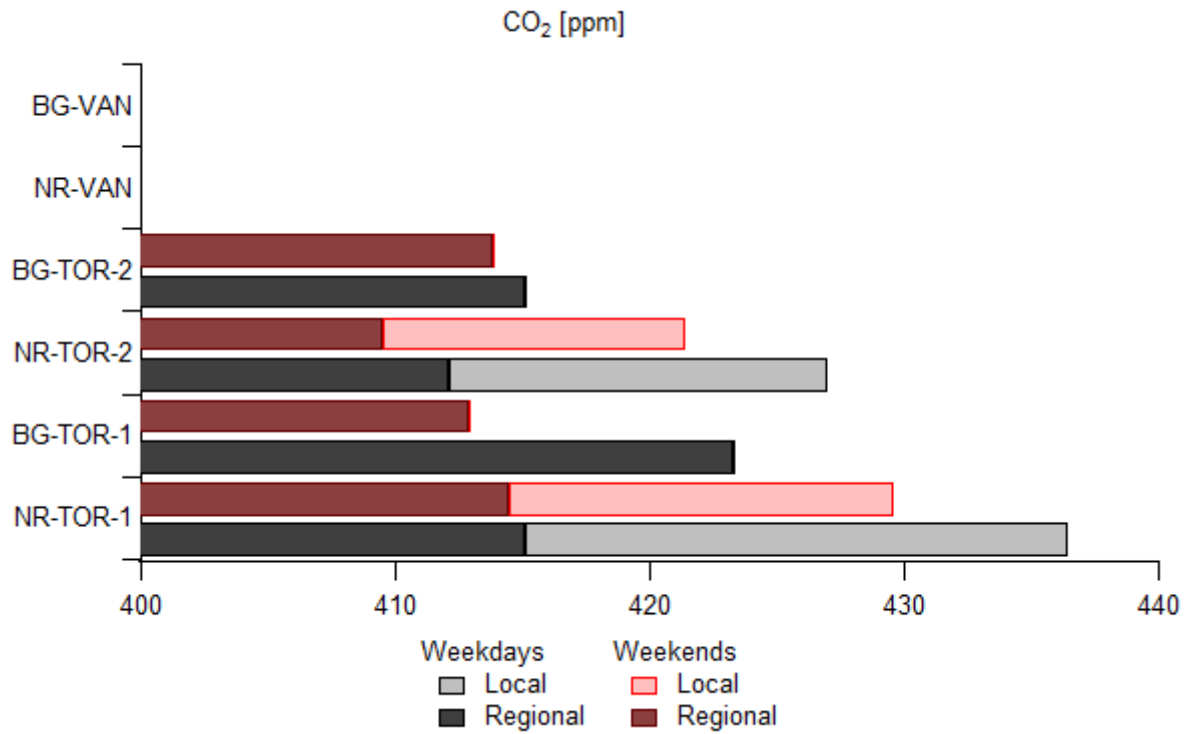

302

303 **Figure S10: Carbon dioxide concentrations measured at each monitoring location in this study. Each site is separated by weekday**  
 304 **and weekend, and bars at near-road sites are stacked according to concentrations attributed to local and regional sources.**  
 305 **Background stations are presumed fully regional and therefore contain no local component. Carbon dioxide data was not measured**  
 306 **at BG-VAN, and so data from NR-VAN are omitted for clarity.**

307

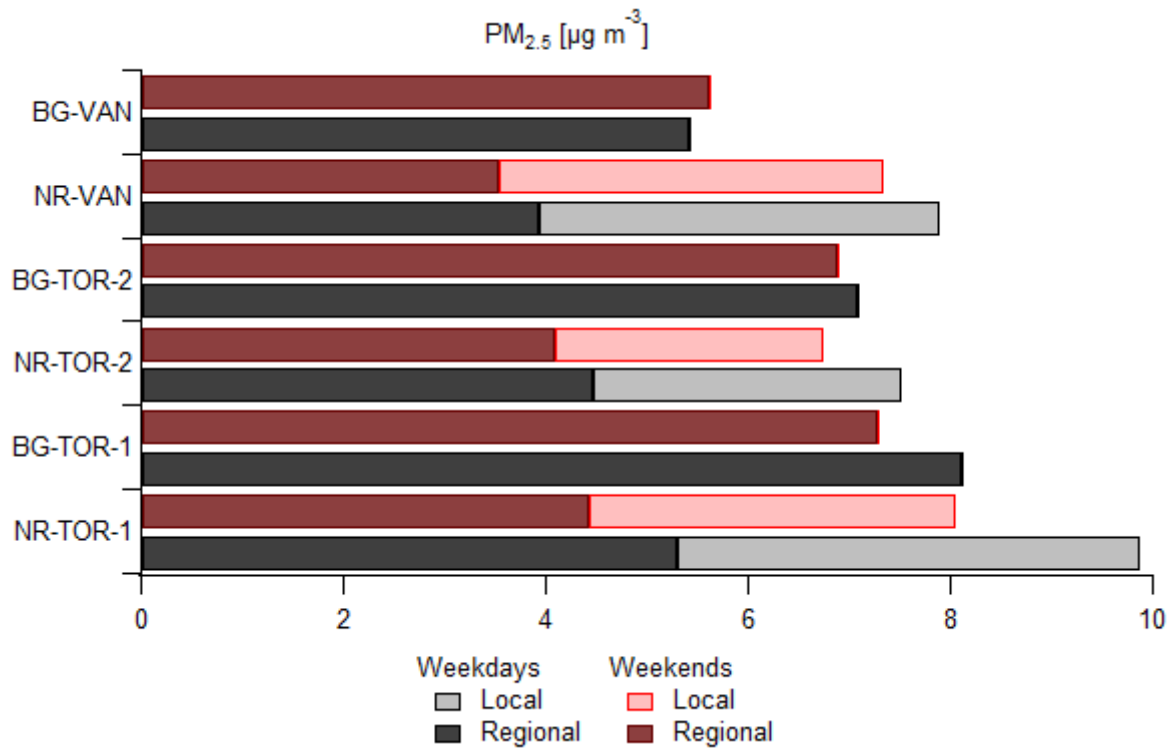

308

309 **Figure S11:  $PM_{2.5}$  concentrations measured at each monitoring location in this study. Each site is separated by weekday and**  
 310 **weekend, and bars at near-road sites are stacked according to concentrations attributed to local and regional sources. Background**  
 311 **stations are presumed fully regional and therefore contain no local component. Large differences between regional contributions**  
 312 **estimated at near-road stations and average concentrations at respective background stations is likely a reflection upon the poor**  
 313 **performance of this methodology when applied to  $PM_{2.5}$ —local components appear to be largely overestimated, and so this method**  
 314 **is not recommended for near-road particulate matter.**

315

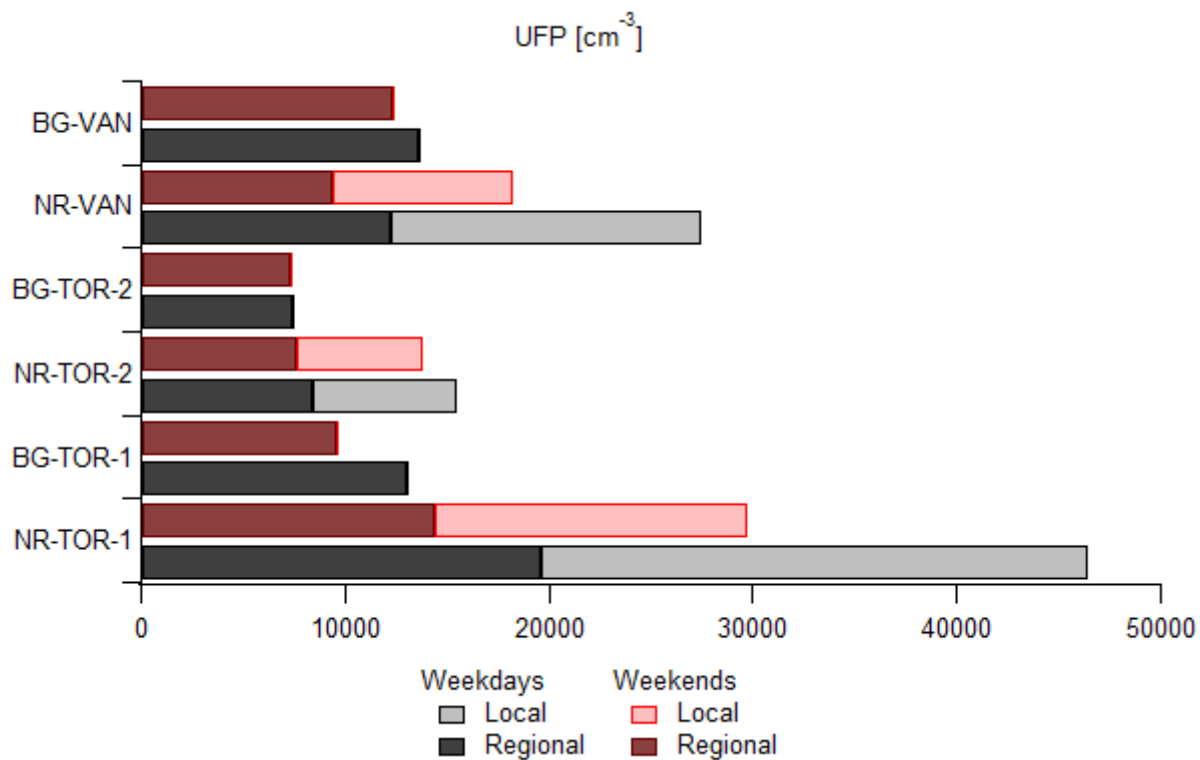

316

317 **Figure S12: Ultrafine particle concentrations measured at each monitoring location in this study. Each site is separated by weekday**  
 318 **and weekend, and bars at near-road sites are stacked according to concentrations attributed to local and regional sources.**  
 319 **Background stations are presumed fully regional and therefore contain no local component.**

320
